# Supplementary material
Source: Research Square preprint supplement (doi:10.21203/rs.3.rs-9408212/v1)
Supplement: Supplementary file 1 [file 2ae7b48e4eed2c21a4b96c5b.pdf]

# Supplementary Materials

## Innovative Framework for Cost-Effective and Reliable Networks via P-graph and Machine Learning in Water Infrastructure Management

Andres Castellar-Freile<sup>1</sup>, Jean Pimentel<sup>2\*</sup>, Ákos Orosz<sup>3</sup>, Brian Guillermo<sup>1</sup>, Deanna Mariano<sup>1</sup>, Heriberto Cabezas<sup>4</sup>, Ferenc Friedler<sup>2</sup>, Kirti M. Yenkie<sup>1\*</sup>

<sup>1</sup>Department of Chemical Engineering, Rowan University, Glassboro, 08028, New Jersey, US

<sup>2</sup>Department of Systems Science, Széchenyi István University, Egyetem tér 1, Győr, H-9026, Hungary

<sup>3</sup>Department of Computer Science and Systems Technology, University of Pannonia, Egyetem u. 10, Veszprém, H-8200, Hungary

<sup>4</sup>Department of Applied Sustainability, Széchenyi István University, Egyetem tér 1, Győr, H-9026, Hungary

\*Corresponding authors

e-mail address: [yenkie@rowan.edu](mailto:yenkie@rowan.edu) (K. M. Yenkie)

e-mail address: [pimentel.losada.jeanpierre.andres@sze.hu](mailto:pimentel.losada.jeanpierre.andres@sze.hu) (J. Pimentel)

### S.1. Hyperparameters for Machine Learning Models

The hyperparameters used for the Machine Learning (ML) models were determined through hyperparameter tuning using cross-validation to improve prediction accuracy and avoid overfitting. The final selected parameters are presented in Table S1.

Table S1. Hyperparameters used for training the machine learning models applied to predict the pipeline failure rate

| Model                               | Hyperparameter          | Value         | Description                                              |
|-------------------------------------|-------------------------|---------------|----------------------------------------------------------|
| Extreme Gradient Boosting (XGBoost) | Subsample               | 0.6           | Fraction of training samples used per iteration          |
|                                     | Number of Estimators    | 40            | Number of boosting trees used in the model               |
|                                     | Maximum Depth           | 5             | Maximum depth of individual trees                        |
|                                     | Learning Rate           | 0.1           | Step size used to update model weights                   |
|                                     | Column Sample by Tree   | 0.8           | Fraction of features used for building each tree         |
|                                     | Number of Iterations    | 100           | Number of boosting rounds used during training           |
|                                     | Objective               | Squared Error | Regression objective minimizing squared error            |
|                                     | Cross-validation Number | 10            | Number of folds used for cross-validation                |
| Neural Networks                     | Neurons 1               | 8             | Neurons of the first hidden layer                        |
|                                     | Neurons 2               | 32            | Neurons of the second hidden layer                       |
|                                     | Dropout Rate            | 0.05          | Fraction of neurons randomly deactivated during training |
|                                     | L2 Lambda               | 0.0001        | Ridge regression (regularization function)               |
|                                     | Batch Size              | 16            | Number of samples processed per training batch           |
|                                     | Epochs                  | 200           | Total training iterations over the dataset               |
|                                     | Activation Function 1   | ReLU          | Activation function of the first hidden layer            |
|                                     | Activation Function 2   | ReLU          | Activation function of the second hidden layer           |
|                                     | Activation Function 3   | Sigmoid       | Activation function of the outer layer                   |
|                                     | Loss                    | MSE           | Regression objective minimizing squared error            |
|                                     | Learning rate           | 0.001         | Step size used for weight updates                        |

## S.2. Complete set of input features used for the machine learning model

Tables S2 and S3 show the complete set of input features used for the ML-based reliability prediction of pipeline segments. The pipe material and flow type variables were transformed into numerical values using label-encoding.

For pipe material, there are eight main types: High-Density Polyethylene (HDPE) encoded as 1, Ductile Iron Pipe (DIP) encoded as 2, Steel pipe encoded as 3, Polyvinyl Chloride (PVC) encoded as 4, Thermoplastic Composite Pipe (TCP) encoded as 5, Reinforced Concrete Pipe (RCP) encoded as 6, Vitrified Concrete Pipe (VCP) encoded as 7, and Asbestos Cement Pipe (ACP) encoded as 8.

Flow type was encoded as follows: flow by gravity (0), and flow by force (1). Additionally, the *Years Since Last Inspection* were calculated using 2024 as the current year.

Table S2. Complete set of input features used for the ML model (part 1)

| Pipe # | Segment Start | Segment End | Remaining Life [Years] | Pipe Size [in] | Pipe Material | Segment Length [km] |
|--------|---------------|-------------|------------------------|----------------|---------------|---------------------|
| 1      | WWTP          | 2           | 30                     | 41.77          | 6             | 0.114               |
| 2      | 2             | PS-3        | 45                     | 33.19          | 3             | 1.391               |
| 3      | PS-3          | 4           | 60                     | 35.80          | 6             | 0.837               |
| 4      | 4             | 5           | 30                     | 33.59          | 6             | 1.055               |
| 5      | 5             | PS-6        | 41                     | 38.58          | 2             | 1.663               |
| 6      | PS-6          | 7           | 30                     | 45.75          | 1             | 0.456               |
| 7      | 7             | 8           | 30                     | 38.99          | 6             | 0.976               |
| 8      | 8             | 9           | 45                     | 41.48          | 5             | 0.752               |
| 9      | 9             | 10          | 41                     | 40.45          | 2             | 0.895               |
| 10     | 10            | 11          | 30                     | 32.65          | 1             | 0.889               |
| 11     | 11            | 12          | 45                     | 30.56          | 5             | 1.129               |
| 12     | 12            | PS-13       | 62                     | 24.54          | 3             | 3.405               |
| 13     | 10            | 14          | 30                     | 16.72          | 6             | 0.725               |
| 14     | 14            | PS-15       | 30                     | 15.42          | 1             | 0.560               |
| 15     | PS-15         | 16          | 30                     | 12.67          | 1             | 0.557               |
| 16     | 17            | 16          | 45                     | 17.06          | 3             | 2.780               |
| 17     | 17            | 18          | 60                     | 18.31          | 3             | 1.984               |
| 18     | 18            | 19          | 30                     | 22.45          | 1             | 0.832               |
| 19     | 19            | PS-3        | 41                     | 25.00          | 2             | 0.393               |
| 20     | PS-3          | 20          | 45                     | 34.30          | 5             | 1.949               |
| 21     | 20            | 21          | 55                     | 21.25          | 6             | 1.300               |
| 22     | 21            | PS-22       | 45                     | 9.66           | 3             | 0.495               |
| 23     | 20            | PS-23       | 41                     | 36.32          | 2             | 3.045               |
| 24     | PS-23         | 24          | 53                     | 34.66          | 6             | 1.138               |
| 25     | 24            | 25          | 30                     | 35.31          | 1             | 1.113               |
| 26     | 26            | 25          | 45                     | 19.71          | 5             | 0.739               |
| 27     | PS-27         | 26          | 45                     | 11.03          | 3             | 0.270               |
| 28     | 16            | PS-27       | 41                     | 12.39          | 2             | 0.848               |
| 29     | PS-23         | 28          | 30                     | 13.81          | 6             | 1.539               |
| 30     | 28            | 29          | 53                     | 13.30          | 1             | 1.840               |
| 31     | 29            | PS-30       | 30                     | 13.01          | 1             | 1.632               |
| 32     | PS-30         | 31          | 30                     | 12.34          | 1             | 0.152               |
| 33     | 32            | 31          | 30                     | 15.53          | 1             | 0.760               |
| 34     | 25            | 32          | 45                     | 17.47          | 3             | 0.868               |
| 35     | PS-3          | WWTP        | 75                     | 41.77          | 6             | 1.505               |
| 36     | PS-22         | WWTP        | 75                     | 9.66           | 6             | 5.250               |
| 37     | PS-6          | PS-3        | 75                     | 38.58          | 6             | 3.554               |
| 38     | PS-6          | 7           | 75                     | 45.75          | 6             | 0.456               |
| 39     | 7             | 8           | 75                     | 38.99          | 6             | 0.976               |

|    |       |    |    |       |   |       |
|----|-------|----|----|-------|---|-------|
| 40 | 10    | 8  | 75 | 32.65 | 6 | 1.647 |
| 41 | PS-13 | 10 | 75 | 40.45 | 6 | 5.423 |
| 42 | PS-3  | 20 | 75 | 34.30 | 6 | 1.949 |

Table S3. Complete set of input features used for the ML model (part 2)

| Pipe # | Years Since Last Inspection | Original Installation [Year] | Population Density [ppsqmi] | Flow Type | Flow Rate [MGD] | Distance from WWTP [km] |
|--------|-----------------------------|------------------------------|-----------------------------|-----------|-----------------|-------------------------|
| 1      | 45                          | 1980                         | 10.38                       | 0         | 21.15           | 0.114                   |
| 2      | 30                          | 1995                         | 10.38                       | 1         | 21.15           | 1.505                   |
| 3      | 15                          | 1980                         | 10.38                       | 0         | 8.64            | 2.342                   |
| 4      | 45                          | 1980                         | 10.38                       | 0         | 8.64            | 3.397                   |
| 5      | 34                          | 1991                         | 10.38                       | 1         | 8.64            | 5.060                   |
| 6      | 45                          | 1980                         | 10.38                       | 0         | 8.64            | 5.515                   |
| 7      | 45                          | 1980                         | 10.38                       | 0         | 8.64            | 6.491                   |
| 8      | 30                          | 1995                         | 1797.42                     | 0         | 8.64            | 7.243                   |
| 9      | 34                          | 1991                         | 1797.42                     | 0         | 8.64            | 8.138                   |
| 10     | 45                          | 1980                         | 1797.42                     | 0         | 6.16            | 9.027                   |
| 11     | 30                          | 1995                         | 1797.42                     | 0         | 6.16            | 10.156                  |
| 12     | 13                          | 1995                         | 1797.42                     | 1         | 6.16            | 13.561                  |
| 13     | 45                          | 1980                         | 1797.42                     | 0         | 2.49            | 8.863                   |
| 14     | 45                          | 1980                         | 1208.29                     | 1         | 2.49            | 9.423                   |
| 15     | 45                          | 1980                         | 1208.29                     | 1         | 0.03            | 8.051                   |
| 16     | 30                          | 1995                         | 2621.02                     | 0         | 3.39            | 7.494                   |
| 17     | 15                          | 1995                         | 2621.02                     | 0         | 3.39            | 4.714                   |
| 18     | 45                          | 1980                         | 2621.02                     | 0         | 3.39            | 2.730                   |
| 19     | 34                          | 1991                         | 2621.02                     | 0         | 3.39            | 1.899                   |
| 20     | 30                          | 1995                         | 3625.13                     | 0         | 9.11            | 3.454                   |
| 21     | 20                          | 1980                         | 3625.13                     | 0         | 1.91            | 4.755                   |
| 22     | 30                          | 1995                         | 3625.13                     | 0         | 1.91            | 5.250                   |
| 23     | 34                          | 1991                         | 3625.13                     | 1         | 7.20            | 6.500                   |
| 24     | 22                          | 1980                         | 3625.13                     | 0         | 6.18            | 7.637                   |
| 25     | 45                          | 1980                         | 1691.11                     | 0         | 6.18            | 8.750                   |
| 26     | 30                          | 1995                         | 1691.11                     | 0         | 2.83            | 9.490                   |
| 27     | 30                          | 1995                         | 1691.11                     | 1         | 2.83            | 9.760                   |
| 28     | 34                          | 1991                         | 1691.11                     | 1         | 3.36            | 8.342                   |
| 29     | 45                          | 1980                         | 3625.13                     | 0         | 1.02            | 8.039                   |
| 30     | 22                          | 1980                         | 3625.13                     | 0         | 1.02            | 9.879                   |
| 31     | 45                          | 1980                         | 424.71                      | 1         | 1.02            | 11.511                  |
| 32     | 45                          | 1980                         | 424.71                      | 1         | 3.35            | 10.531                  |
| 33     | 45                          | 1980                         | 424.71                      | 0         | 3.35            | 10.379                  |
| 34     | 30                          | 1995                         | 424.71                      | 0         | 3.35            | 9.619                   |
| 35     | 0                           | 2025                         | 10.38                       | 1         | 21.15           | 1.505                   |
| 36     | 0                           | 2025                         | 3625.13                     | 1         | 1.91            | 5.250                   |
| 37     | 0                           | 2025                         | 10.38                       | 1         | 8.64            | 5.060                   |
| 38     | 0                           | 2025                         | 10.38                       | 0         | 8.64            | 5.515                   |
| 39     | 0                           | 2025                         | 10.38                       | 0         | 8.64            | 6.491                   |
| 40     | 0                           | 2025                         | 1797.42                     | 0         | 8.64            | 8.138                   |
| 41     | 0                           | 2025                         | 1797.42                     | 1         | 6.16            | 13.561                  |
| 42     | 0                           | 2025                         | 3625.13                     | 0         | 9.11            | 3.454                   |

### S.3. Design and cost calculations for pipelines and storage tanks

The design and cost calculations for pipelines in the proposed case study are shown in Tables S4 and S5, respectively. To obtain the maximum flow rate, we used the maximum allowed velocity for pipeline segments in the pumps' suction and discharge. The prices were updated using the Chemical Engineering Plant Cost Index (CEPCI) for 2024 and 2022, whose values are 798.8 and 816, respectively [1]. The prices were obtained from AmeriTex Pipe & Products LLC for RCP material [2].

Table S4. Design calculations for pipelines in the proposed wastewater transportation case study

| Pipe # | Pipe Diameter [in] | Pipe Length [km] | Flow Rate [m <sup>3</sup> /h] | Flow Area [m <sup>2</sup> ] | Velocity [m/s] | Maximum Velocity [m/s] | Max Flow Rate [m <sup>3</sup> /h] |
|--------|--------------------|------------------|-------------------------------|-----------------------------|----------------|------------------------|-----------------------------------|
| 1      | 41.77              | 0.11             | 3335                          | 0.88                        | 1.05           | 7.6                    | 24187                             |
| 2      | 33.19              | 1.39             | 3335                          | 0.56                        | 1.66           | 7.6                    | 15274                             |
| 3      | 35.80              | 0.84             | 1364                          | 0.65                        | 0.58           | 7.6                    | 17771                             |
| 4      | 33.59              | 1.06             | 1364                          | 0.57                        | 0.66           | 7.6                    | 15643                             |
| 5      | 38.58              | 1.66             | 1364                          | 0.75                        | 0.50           | 7.6                    | 20631                             |
| 6      | 45.75              | 0.46             | 1364                          | 1.06                        | 0.36           | 1.2                    | 4583                              |
| 7      | 38.99              | 0.98             | 1364                          | 0.77                        | 0.49           | 7.6                    | 21081                             |
| 8      | 41.48              | 0.75             | 1364                          | 0.87                        | 0.43           | 7.6                    | 23850                             |
| 9      | 40.45              | 0.90             | 1364                          | 0.83                        | 0.46           | 7.6                    | 22687                             |
| 10     | 32.65              | 0.89             | 971                           | 0.54                        | 0.50           | 7.6                    | 14781                             |
| 11     | 30.56              | 1.13             | 971                           | 0.47                        | 0.57           | 7.6                    | 12944                             |
| 12     | 24.54              | 3.41             | 971                           | 0.31                        | 0.88           | 7.6                    | 8347                              |
| 13     | 16.72              | 0.72             | 393                           | 0.14                        | 0.77           | 7.6                    | 3875                              |
| 14     | 15.42              | 0.56             | 393                           | 0.12                        | 0.91           | 7.6                    | 3296                              |
| 15     | 12.67              | 0.56             | 5                             | 0.08                        | 0.02           | 7.6                    | 2225                              |
| 16     | 17.06              | 2.78             | 535                           | 0.15                        | 1.01           | 7.6                    | 4037                              |
| 17     | 18.31              | 1.98             | 535                           | 0.17                        | 0.88           | 7.6                    | 4646                              |
| 18     | 22.45              | 0.83             | 535                           | 0.26                        | 0.58           | 7.6                    | 6986                              |
| 19     | 25.00              | 0.39             | 535                           | 0.32                        | 0.47           | 7.6                    | 8668                              |
| 20     | 34.30              | 1.95             | 1437                          | 0.60                        | 0.67           | 1.2                    | 2576                              |
| 21     | 21.25              | 1.30             | 301                           | 0.23                        | 0.37           | 7.6                    | 6261                              |
| 22     | 9.66               | 0.50             | 301                           | 0.05                        | 1.77           | 7.6                    | 1293                              |
| 23     | 36.32              | 3.05             | 1136                          | 0.67                        | 0.47           | 7.6                    | 18290                             |
| 24     | 34.66              | 1.14             | 975                           | 0.61                        | 0.44           | 7.6                    | 16656                             |
| 25     | 35.31              | 1.11             | 975                           | 0.63                        | 0.43           | 7.6                    | 17288                             |
| 26     | 19.71              | 0.74             | 446                           | 0.20                        | 0.63           | 7.6                    | 5385                              |
| 27     | 11.03              | 0.27             | 446                           | 0.06                        | 2.01           | 7.6                    | 1687                              |
| 28     | 12.39              | 0.85             | 531                           | 0.08                        | 1.89           | 7.6                    | 2130                              |
| 29     | 13.81              | 1.54             | 161                           | 0.10                        | 0.46           | 1.2                    | 418                               |
| 30     | 13.30              | 1.84             | 161                           | 0.09                        | 0.50           | 7.6                    | 2451                              |
| 31     | 13.01              | 1.63             | 161                           | 0.09                        | 0.52           | 7.6                    | 2347                              |
| 32     | 12.34              | 0.15             | 529                           | 0.08                        | 1.90           | 7.6                    | 2112                              |
| 33     | 15.53              | 0.76             | 529                           | 0.12                        | 1.20           | 7.6                    | 3344                              |
| 34     | 17.47              | 0.87             | 529                           | 0.15                        | 0.95           | 7.6                    | 4233                              |
| 35     | 41.77              | 1.51             | 3335                          | 0.88                        | 1.05           | 7.6                    | 24187                             |
| 36     | 9.66               | 5.25             | 301                           | 0.05                        | 1.77           | 7.6                    | 1293                              |
| 37     | 38.58              | 3.55             | 1364                          | 0.75                        | 0.50           | 7.6                    | 20631                             |
| 38     | 45.75              | 0.46             | 1364                          | 1.06                        | 0.36           | 7.6                    | 29021                             |
| 39     | 38.99              | 0.98             | 1364                          | 0.77                        | 0.49           | 7.6                    | 21081                             |
| 40     | 32.65              | 1.65             | 1364                          | 0.54                        | 0.70           | 7.6                    | 14781                             |
| 41     | 40.45              | 5.42             | 971                           | 0.83                        | 0.33           | 7.6                    | 22687                             |
| 42     | 34.30              | 1.95             | 1437                          | 0.60                        | 0.67           | 7.6                    | 16312                             |

Table S5. Cost calculations for pipelines in the proposed wastewater transportation case study

| Pipe # | Cost 2022<br>[USD/ft] | Cost 2022<br>[USD] | Cost 2024<br>[USD] | Annualized Cost<br>[USD/y] |
|--------|-----------------------|--------------------|--------------------|----------------------------|
| 1      | 0                     | \$                 | - \$               | - \$                       |
| 2      | 0                     | \$                 | - \$               | - \$                       |
| 3      | 0                     | \$                 | - \$               | - \$                       |
| 4      | 0                     | \$                 | - \$               | - \$                       |
| 5      | 0                     | \$                 | - \$               | - \$                       |
| 6      | 0                     | \$                 | - \$               | - \$                       |
| 7      | 0                     | \$                 | - \$               | - \$                       |
| 8      | 0                     | \$                 | - \$               | - \$                       |
| 9      | 0                     | \$                 | - \$               | - \$                       |
| 10     | 0                     | \$                 | - \$               | - \$                       |
| 11     | 0                     | \$                 | - \$               | - \$                       |
| 12     | 0                     | \$                 | - \$               | - \$                       |
| 13     | 0                     | \$                 | - \$               | - \$                       |
| 14     | 0                     | \$                 | - \$               | - \$                       |
| 15     | 0                     | \$                 | - \$               | - \$                       |
| 16     | 0                     | \$                 | - \$               | - \$                       |
| 17     | 0                     | \$                 | - \$               | - \$                       |
| 18     | 0                     | \$                 | - \$               | - \$                       |
| 19     | 0                     | \$                 | - \$               | - \$                       |
| 20     | 0                     | \$                 | - \$               | - \$                       |
| 21     | 0                     | \$                 | - \$               | - \$                       |
| 22     | 0                     | \$                 | - \$               | - \$                       |
| 23     | 0                     | \$                 | - \$               | - \$                       |
| 24     | 0                     | \$                 | - \$               | - \$                       |
| 25     | 0                     | \$                 | - \$               | - \$                       |
| 26     | 0                     | \$                 | - \$               | - \$                       |
| 27     | 0                     | \$                 | - \$               | - \$                       |
| 28     | 0                     | \$                 | - \$               | - \$                       |
| 29     | 0                     | \$                 | - \$               | - \$                       |
| 30     | 0                     | \$                 | - \$               | - \$                       |
| 31     | 0                     | \$                 | - \$               | - \$                       |
| 32     | 0                     | \$                 | - \$               | - \$                       |
| 33     | 0                     | \$                 | - \$               | - \$                       |
| 34     | 0                     | \$                 | - \$               | - \$                       |
| 35     | \$ 3,714.08           | \$ 18,343,603.18   | \$ 17,956,948.80   | \$ 2,154,859.66            |
| 36     | \$ 825.92             | \$ 14,226,223.44   | \$ 13,926,356.96   | \$ 1,671,182.84            |
| 37     | \$ 3,219.35           | \$ 37,541,116.90   | \$ 36,749,809.05   | \$ 4,410,029.89            |
| 38     | \$ 4,481.75           | \$ 6,698,370.70    | \$ 6,557,179.55    | \$ 786,870.97              |
| 39     | \$ 3,284.18           | \$ 10,514,571.61   | \$ 10,292,940.94   | \$ 1,235,167.70            |
| 40     | \$ 2,535.37           | \$ 13,701,256.86   | \$ 13,412,455.86   | \$ 1,609,513.97            |
| 41     | \$ 3,510.20           | \$ 62,453,245.64   | \$ 61,136,829.19   | \$ 7,336,507.34            |
| 42     | \$ 2,675.58           | \$ 17,108,925.49   | \$ 16,748,296.18   | \$ 2,009,819.60            |

The design and cost calculations for storage tanks in the proposed case study are shown in Tables S6 and S7, respectively. The number of tanks was calculated using a standard tank capacity of 1,000,000 gallons with a 66 ft diameter and 40 ft height obtained from CST Industries [3]. The cost for this tank was obtained from Matches [4] and was updated using the CEPCI values for 2014 and 2024 [1].

Table S6. Design calculations for storage tanks in the proposed wastewater transportation case study

| Place    | Flow Rate [m <sup>3</sup> /h] | Flow in each point [m <sup>3</sup> ] | Required Storage Volume [m <sup>3</sup> ] | Total Tanks | Standard Volume [m <sup>3</sup> ] |
|----------|-------------------------------|--------------------------------------|-------------------------------------------|-------------|-----------------------------------|
| Region A | 301                           | 7217                                 | 7217                                      | 2           | 7572                              |
| Region B | 690                           | 16556                                | 16556                                     | 5           | 18930                             |
| Region C | 977                           | 23440                                | 23440                                     | 7           | 26502                             |
| Region D | 397                           | 9536                                 | 9536                                      | 3           | 11358                             |
| Region E | 971                           | 23300                                | 23300                                     | 7           | 26502                             |
| Total    | 3335                          | 80049                                | 80049                                     | 24          | 90864                             |

Table S7. Cost calculations for storage tanks in the proposed wastewater transportation case study

| Place    | Cost 2014 [USD] | Cost 2024 [USD] | Total Cost (with installation) [USD] | Annualized Cost [USD/y] |
|----------|-----------------|-----------------|--------------------------------------|-------------------------|
| Region A | \$ 427,000.00   | \$ 592,063.18   | \$ 1,420,951.64                      | \$ 190,235.27           |
| Region B | \$ 1,067,500.00 | \$ 1,480,157.96 | \$ 3,552,379.10                      | \$ 475,588.18           |
| Region C | \$ 1,494,500.00 | \$ 2,072,221.14 | \$ 4,973,330.74                      | \$ 665,823.45           |
| Region D | \$ 640,500.00   | \$ 888,094.78   | \$ 2,131,427.46                      | \$ 285,352.91           |
| Region E | \$ 1,494,500.00 | \$ 2,072,221.14 | \$ 4,973,330.74                      | \$ 665,823.45           |
| Total    | \$ 5,124,000.00 | \$ 7,104,758.20 | \$ 17,051,419.68                     | \$ 2,282,823.27         |

#### S.4. Sensitivity Analysis for Simultaneous Failures in the P-graph Framework

A sensitivity analysis was conducted to evaluate the impact of the number of simultaneous failures considered in the reliability assessment of the case study proposed for the wastewater transportation network. The analysis examines both the deviation (i.e. upper reliability bound – lower reliability bound/average reliability) in the estimated reliability values and the computational time required to evaluate all feasible configurations (2,048 network alternatives). All runs were performed using an Intel® Core i5 (11th generation) processor with 8 GB RAM. Fig. S1 presents the deviation in the estimated reliability values as a function of the maximum number of simultaneous failures considered, while Table S8 illustrates the corresponding computational time required for the reliability evaluation.

### Sensitivity analysis for number of simultaneous failures

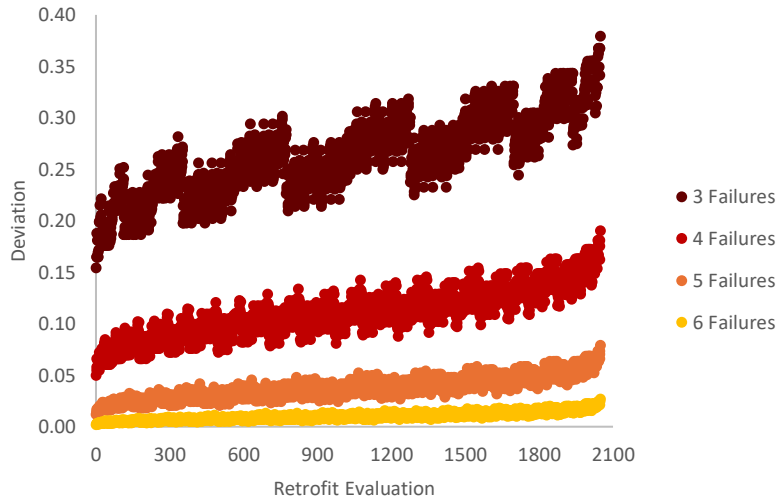

Fig. S1 Sensitivity analysis showing the deviation in the estimated reliability values for different limits on the number of simultaneous failures considered in the P-graph reliability evaluation

When only three simultaneous failures are included, the deviation can exceed 0.30 for some retrofit configurations, indicating a significant overestimation of reliability. Increasing the limit to four failures substantially reduces the deviation, while considering five failures further improves the accuracy, with deviations generally remaining below approximately 0.07. When six simultaneous failures are included, the deviation becomes very small, typically remaining below 0.03.

Table S8. Sensitivity analysis of the computational running time required for the reliability evaluation as a function of the number of simultaneous failures considered in the P-graph framework

| Simultaneous Failures | Time [s] | Time [h] |
|-----------------------|----------|----------|
| 3                     | 1,001    | 0.28     |
| 4                     | 4,459    | 1.24     |
| 5                     | 33,805   | 9.39     |
| 6                     | 135,314  | 37.59    |

While increasing the number of simultaneous failures improves the accuracy of the reliability estimation, it also significantly increases the computational effort required for the evaluation. As shown in Table S8, the computational running time for the entire set of designs grows rapidly with the number of simultaneous failures considered. The running time increases from approximately 0.28 hours when three failures are considered to 1.24 hours for four failures and 9.39 hours for five failures. When six simultaneous failures are evaluated, the running time rises dramatically to approximately 37.59 hours.

Taken together, these results highlight the trade-off between reliability estimation accuracy and computational efficiency. Based on this analysis, limiting the reliability evaluation to five simultaneous failures provides a practical balance between acceptable accuracy and manageable computational effort.

### S.5. Results of the sensitivity analysis for adding storage tanks

The Pareto set results for varying the storage tank capacity at 100%, 75%, 50%, and 25% are shown in Tables S9, S10, S11, and S12, respectively.

Table S9. Pareto set for 100% storage tank capacity

| N    | Reliability Minimum | Reliability Maximum | Cost [10 <sup>6</sup> USD/y] | Ext                                                              |
|------|---------------------|---------------------|------------------------------|------------------------------------------------------------------|
| 1995 | 0.923               | 0.982               | \$ 23.32                     | '{T3', 'P_37', 'P_42', 'T5', 'T4', 'P_41', 'P_35', 'P_38', 'T2}' |
| 1886 | 0.926               | 0.977               | \$ 21.31                     | '{T3', 'P_37', 'T5', 'T4', 'P_41', 'P_35', 'P_38', 'T2}'         |
| 1835 | 0.928               | 0.974               | \$ 15.99                     | '{T3', 'P_37', 'P_42', 'T5', 'T4', 'P_35', 'P_38', 'T2}'         |
| 1575 | 0.929               | 0.969               | \$ 13.98                     | '{T3', 'P_37', 'T5', 'T4', 'P_35', 'P_38', 'T2}'                 |
| 1499 | 0.930               | 0.967               | \$ 10.67                     | '{T3', 'P_37', 'P_42', 'T5', 'T4', 'P_35', 'T2}'                 |
| 1093 | 0.930               | 0.962               | \$ 8.66                      | '{T3', 'P_37', 'T5', 'T4', 'P_35', 'T2}'                         |
| 1163 | 0.930               | 0.960               | \$ 6.26                      | '{T3', 'P_42', 'T5', 'T4', 'P_35', 'T2}'                         |
| 715  | 0.929               | 0.954               | \$ 4.25                      | '{T3', 'T5', 'T4', 'P_35', 'T2}'                                 |
| 651  | 0.925               | 0.950               | \$ 4.10                      | '{T3', 'P_42', 'T5', 'T4', 'T2}'                                 |
| 301  | 0.923               | 0.944               | \$ 2.09                      | '{T2', 'T5', 'T3', 'T4}'                                         |
| 310  | 0.750               | 0.771               | \$ 2.00                      | '{T1', 'T5', 'T3', 'T2}'                                         |
| 90   | 0.750               | 0.769               | \$ 1.81                      | '{T5', 'T3', 'T2}'                                               |
| 500  | 0.738               | 0.759               | \$ 1.62                      | '{T1', 'T5', 'T2', 'T4}'                                         |
| 181  | 0.739               | 0.757               | \$ 1.43                      | '{T5', 'T2', 'T4}'                                               |
| 190  | 0.668               | 0.687               | \$ 1.33                      | '{T1', 'T5', 'T2}'                                               |
| 45   | 0.668               | 0.685               | \$ 1.14                      | '{T5', 'T2}'                                                     |
| 39   | 0.556               | 0.572               | \$ 0.95                      | '{T5', 'T4}'                                                     |
| 41   | 0.500               | 0.516               | \$ 0.86                      | '{T1', 'T5}'                                                     |
| 4    | 0.492               | 0.506               | \$ 0.67                      | '{T5}'                                                           |
| 11   | 0.388               | 0.403               | \$ 0.48                      | '{T2}'                                                           |
| 5    | 0.301               | 0.315               | \$ 0.29                      | '{T4}'                                                           |
| 7    | 0.295               | 0.309               | \$ 0.19                      | '{T1}'                                                           |
| 0    | 0.290               | 0.303               | \$ -                         | 'set()'                                                          |

Table S10. Pareto set for 75% storage tank capacity

| N    | Reliability Minimum | Reliability Maximum | Cost [10 <sup>6</sup> USD/y] | Ext                                                                    |
|------|---------------------|---------------------|------------------------------|------------------------------------------------------------------------|
| 2039 | 0.905               | 0.968               | \$ 22.94                     | '{T1', 'P_41', 'P_37', 'T3', 'P_35', 'P_42', 'T4', 'T5', 'P_38', 'T2}' |
| 2045 | 0.899               | 0.963               | \$ 19.07                     | '{T1', 'P_37', 'T3', 'P_35', 'P_42', 'T4', 'P_36', 'T5', 'P_38', 'T2}' |
| 2020 | 0.904               | 0.954               | \$ 15.60                     | '{T1', 'P_37', 'T3', 'P_35', 'P_42', 'T4', 'T5', 'P_38', 'T2}'         |
| 2018 | 0.897               | 0.949               | \$ 13.75                     | '{T1', 'P_37', 'T3', 'P_35', 'P_42', 'T4', 'P_36', 'T5', 'T2}'         |
| 1973 | 0.892               | 0.941               | \$ 13.66                     | '{P_37', 'T3', 'P_35', 'P_42', 'T4', 'P_36', 'T5', 'T2}'               |
| 1904 | 0.895               | 0.935               | \$ 10.29                     | '{T1', 'P_37', 'T3', 'P_35', 'P_42', 'T4', 'T5', 'T2}'                 |
| 1929 | 0.892               | 0.934               | \$ 9.34                      | '{T1', 'T3', 'P_35', 'P_42', 'T4', 'P_36', 'T5', 'T2}'                 |
| 1809 | 0.886               | 0.925               | \$ 9.25                      | '{T3', 'P_35', 'P_42', 'T4', 'P_36', 'T5', 'T2}'                       |
| 1672 | 0.883               | 0.916               | \$ 5.88                      | '{T1', 'T3', 'P_35', 'P_42', 'T4', 'T5', 'T2}'                         |
| 1462 | 0.844               | 0.873               | \$ 5.78                      | '{T3', 'P_35', 'P_42', 'T4', 'T5', 'T2}'                               |
| 1234 | 0.838               | 0.865               | \$ 3.87                      | '{T1', 'T3', 'P_35', 'T4', 'T5', 'T2}'                                 |
| 1244 | 0.822               | 0.850               | \$ 3.72                      | '{T1', 'T3', 'P_42', 'T4', 'T5', 'T2}'                                 |
| 992  | 0.785               | 0.810               | \$ 3.63                      | '{T3', 'P_42', 'T4', 'T5', 'T2}'                                       |
| 731  | 0.779               | 0.802               | \$ 1.71                      | '{T1', 'T3', 'T4', 'T5', 'T2}'                                         |
| 315  | 0.703               | 0.724               | \$ 1.52                      | '{T5', 'T3', 'T1', 'T2}'                                               |
| 346  | 0.692               | 0.713               | \$ 1.14                      | '{T5', 'T1', 'T2', 'T4}'                                               |
| 226  | 0.629               | 0.648               | \$ 1.05                      | '{T5', 'T4', 'T2}'                                                     |
| 110  | 0.629               | 0.648               | \$ 0.95                      | '{T5', 'T1', 'T2}'                                                     |

|     |       |       |         |                |
|-----|-------|-------|---------|----------------|
| 65  | 0.568 | 0.584 | \$ 0.86 | '{T5, T2}'     |
| 103 | 0.514 | 0.533 | \$ 0.76 | '{T5, T1, T4}' |
| 58  | 0.495 | 0.512 | \$ 0.67 | '{T5, T4}'     |
| 19  | 0.461 | 0.477 | \$ 0.57 | '{T5, T1}'     |
| 9   | 0.443 | 0.457 | \$ 0.48 | '{T5}'         |
| 11  | 0.346 | 0.360 | \$ 0.38 | '{T2}'         |
| 17  | 0.300 | 0.316 | \$ 0.29 | '{T1, T4}'     |
| 7   | 0.299 | 0.313 | \$ 0.19 | '{T4}'         |
| 1   | 0.290 | 0.305 | \$ 0.10 | '{T1}'         |
| 0   | 0.290 | 0.303 | \$ -    | 'set()'        |

Table S11. Pareto set for 50% storage tank capacity

| N    | Reliability Minimum | Reliability Maximum | Cost [10 <sup>6</sup> USD/y] | Ext                                                    |
|------|---------------------|---------------------|------------------------------|--------------------------------------------------------|
| 2042 | 0.744               | 0.818               | \$ 25.46                     | '{P_35, T5, P_37, P_36, T1, P_38, P_41, T4, P_42, T2}' |
| 2023 | 0.746               | 0.815               | \$ 25.17                     | '{P_35, P_37, P_36, T1, P_38, P_41, T4, P_42, T2}'     |
| 1927 | 0.749               | 0.812               | \$ 25.08                     | '{P_35, P_37, P_36, P_38, P_41, T4, P_42, T2}'         |
| 2041 | 0.734               | 0.797               | \$ 22.37                     | '{P_35, T5, P_37, T1, T3, P_38, P_41, T4, P_42, T2}'   |
| 2001 | 0.736               | 0.795               | \$ 21.99                     | '{P_35, T5, P_37, T1, P_38, P_41, T4, P_42, T2}'       |
| 1920 | 0.738               | 0.792               | \$ 21.70                     | '{P_35, P_37, T1, P_38, P_41, T4, P_42, T2}'           |
| 1667 | 0.739               | 0.789               | \$ 21.61                     | '{P_35, P_37, P_38, P_41, T4, P_42, T2}'               |
| 1217 | 0.721               | 0.767               | \$ 21.51                     | '{P_35, P_37, P_38, P_41, P_42, T2}'                   |
| 2031 | 0.684               | 0.741               | \$ 20.22                     | '{T5, P_37, T1, P_38, T3, P_41, T4, P_42, T2}'         |
| 1956 | 0.686               | 0.738               | \$ 19.84                     | '{T5, P_37, T1, P_38, P_41, T4, P_42, T2}'             |
| 1800 | 0.687               | 0.735               | \$ 19.55                     | '{P_37, T1, P_38, P_41, T4, P_42, T2}'                 |
| 1457 | 0.688               | 0.732               | \$ 19.45                     | '{P_37, P_38, P_41, T4, P_42, T2}'                     |
| 965  | 0.671               | 0.712               | \$ 19.36                     | '{P_37, P_38, P_41, P_42, T2}'                         |
| 1995 | 0.632               | 0.684               | \$ 17.05                     | '{P_35, T5, P_37, T1, T3, P_41, T4, P_42, T2}'         |
| 1850 | 0.633               | 0.681               | \$ 16.67                     | '{P_35, T5, P_37, T1, P_41, T4, P_42, T2}'             |
| 1646 | 0.634               | 0.678               | \$ 16.39                     | '{P_35, P_37, T1, P_41, T4, P_42, T2}'                 |
| 1219 | 0.635               | 0.675               | \$ 16.29                     | '{P_35, P_37, P_41, T4, P_42, T2}'                     |
| 700  | 0.619               | 0.656               | \$ 16.20                     | '{P_35, P_37, P_41, P_42, T2}'                         |
| 1994 | 0.605               | 0.656               | \$ 15.03                     | '{P_35, T5, P_37, T1, T3, P_38, T4, P_42, T2}'         |
| 1849 | 0.606               | 0.653               | \$ 14.65                     | '{P_35, T5, P_37, T1, P_38, T4, P_42, T2}'             |
| 1645 | 0.607               | 0.650               | \$ 14.37                     | '{P_35, P_37, T1, P_38, T4, P_42, T2}'                 |
| 1218 | 0.608               | 0.647               | \$ 14.27                     | '{P_35, P_37, P_38, T4, P_42, T2}'                     |
| 697  | 0.592               | 0.628               | \$ 14.18                     | '{P_35, P_37, P_38, P_42, T2}'                         |
| 967  | 0.590               | 0.625               | \$ 14.14                     | '{P_37, P_41, T4, P_42, T2}'                           |
| 490  | 0.575               | 0.606               | \$ 14.04                     | '{P_37, P_42, T2, P_41}'                               |
| 1949 | 0.563               | 0.608               | \$ 12.88                     | '{T5, P_37, T1, P_38, T3, T4, P_42, T2}'               |
| 1729 | 0.563               | 0.604               | \$ 12.50                     | '{T5, P_37, T1, P_38, T4, P_42, T2}'                   |
| 1435 | 0.564               | 0.601               | \$ 12.21                     | '{P_37, T1, P_38, T4, P_42, T2}'                       |
| 966  | 0.564               | 0.598               | \$ 12.12                     | '{P_37, P_38, T4, P_42, T2}'                           |
| 487  | 0.550               | 0.580               | \$ 12.02                     | '{P_37, P_42, P_38, T2}'                               |
| 1254 | 0.531               | 0.566               | \$ 11.98                     | '{P_35, T1, P_41, T4, P_42, T2}'                       |
| 771  | 0.531               | 0.563               | \$ 11.88                     | '{P_35, P_41, T4, P_42, T2}'                           |
| 1835 | 0.519               | 0.560               | \$ 9.72                      | '{P_35, T5, P_37, T1, T3, T4, P_42, T2}'               |
| 1520 | 0.520               | 0.556               | \$ 9.34                      | '{P_35, T5, P_37, T1, T4, P_42, T2}'                   |
| 1184 | 0.520               | 0.553               | \$ 9.05                      | '{P_35, P_37, T1, T4, P_42, T2}'                       |
| 701  | 0.520               | 0.551               | \$ 8.96                      | '{P_35, P_37, T4, P_42, T2}'                           |
| 295  | 0.507               | 0.534               | \$ 8.86                      | '{P_37, P_35, P_42, T2}'                               |
| 1715 | 0.482               | 0.517               | \$ 7.56                      | '{T5, P_37, T1, T3, T4, P_42, T2}'                     |
| 1310 | 0.482               | 0.514               | \$ 7.18                      | '{T5, P_37, T1, T4, P_42, T2}'                         |

|      |       |       |         |                                          |
|------|-------|-------|---------|------------------------------------------|
| 932  | 0.482 | 0.511 | \$ 6.90 | '{P_37, 'T1', 'T4', 'P_42', 'T2}'        |
| 491  | 0.482 | 0.509 | \$ 6.80 | '{T4, 'P_37, 'P_42, 'T2}'                |
| 175  | 0.470 | 0.493 | \$ 6.71 | '{P_37, 'P_42, 'T2}'                     |
| 1575 | 0.433 | 0.466 | \$ 5.31 | '{P_35, 'T5, 'T1, 'T3, 'T4, 'P_42, 'T2}' |
| 1114 | 0.434 | 0.463 | \$ 4.93 | '{P_35, 'T5, 'T1, 'T4, 'P_42, 'T2}'      |
| 736  | 0.434 | 0.460 | \$ 4.64 | '{P_35, 'T1, 'T4, 'P_42, 'T2}'           |
| 351  | 0.434 | 0.457 | \$ 4.55 | '{T4, 'P_35, 'P_42, 'T2}'                |
| 111  | 0.422 | 0.443 | \$ 4.45 | '{P_35, 'P_42, 'T2}'                     |
| 1365 | 0.402 | 0.430 | \$ 3.15 | '{T5, 'T1, 'T3, 'T4, 'P_42, 'T2}'        |
| 862  | 0.402 | 0.427 | \$ 2.77 | '{T5, 'T1, 'T4, 'P_42, 'T2}'             |
| 526  | 0.402 | 0.424 | \$ 2.49 | '{T4, 'P_42, 'T1, 'T2}'                  |
| 231  | 0.402 | 0.422 | \$ 2.39 | '{T4, 'P_42, 'T2}'                       |
| 66   | 0.391 | 0.409 | \$ 2.30 | '{P_42, 'T2}'                            |
| 841  | 0.355 | 0.379 | \$ 1.14 | '{T5, 'T1, 'T3, 'T4, 'T2}'               |
| 399  | 0.355 | 0.376 | \$ 0.76 | '{T4, 'T1, 'T5, 'T2}'                    |
| 195  | 0.355 | 0.374 | \$ 0.48 | '{T4, 'T1, 'T2}'                         |
| 65   | 0.355 | 0.372 | \$ 0.38 | '{T4, 'T2}'                              |
| 11   | 0.346 | 0.360 | \$ 0.29 | '{T2}'                                   |
| 43   | 0.299 | 0.315 | \$ 0.19 | '{T4, 'T1}'                              |
| 9    | 0.299 | 0.313 | \$ 0.10 | '{T4}'                                   |
| 0    | 0.290 | 0.303 | \$ -    | 'set()'                                  |

Table S12. Pareto set for 25% storage tank capacity

| N    | Reliability Minimum | Reliability Maximum | Cost [10 <sup>6</sup> USD/y] | Ext                                                                  |
|------|---------------------|---------------------|------------------------------|----------------------------------------------------------------------|
| 2047 | 0.627               | 0.706               | \$ 25.27                     | '{T1, 'T3, 'P_37, 'T4, 'T5, 'P_41, 'P_38, 'P_36, 'P_42, 'P_35, 'T2}' |
| 2045 | 0.628               | 0.702               | \$ 25.08                     | '{T1, 'P_37, 'T4, 'T5, 'P_41, 'P_38, 'P_36, 'P_42, 'P_35, 'T2}'      |
| 2023 | 0.630               | 0.699               | \$ 24.98                     | '{T1, 'P_37, 'T4, 'P_41, 'P_38, 'P_36, 'P_42, 'P_35, 'T2}'           |
| 1915 | 0.630               | 0.693               | \$ 24.89                     | '{T1, 'P_37, 'T4, 'P_41, 'P_38, 'P_36, 'P_42, 'P_35}'                |
| 1972 | 0.630               | 0.693               | \$ 24.89                     | '{P_37, 'T4, 'T5, 'P_41, 'P_38, 'P_36, 'P_42, 'P_35}'                |
| 1978 | 0.630               | 0.693               | \$ 24.89                     | '{P_37, 'T4, 'P_41, 'P_38, 'P_36, 'P_42, 'P_35, 'T2}'                |
| 2039 | 0.629               | 0.693               | \$ 21.80                     | '{T1, 'T3, 'P_37, 'T4, 'T5, 'P_41, 'P_38, 'P_42, 'P_35, 'T2}'        |
| 2020 | 0.631               | 0.690               | \$ 21.61                     | '{T1, 'P_37, 'T4, 'T5, 'P_41, 'P_38, 'P_42, 'P_35, 'T2}'             |
| 1918 | 0.632               | 0.686               | \$ 21.51                     | '{T1, 'P_37, 'T4, 'P_41, 'P_38, 'P_42, 'P_35, 'T2}'                  |
| 1635 | 0.624               | 0.674               | \$ 21.42                     | '{T1, 'P_37, 'T4, 'P_41, 'P_38, 'P_42, 'P_35}'                       |
| 1783 | 0.624               | 0.674               | \$ 21.42                     | '{P_37, 'T4, 'T5, 'P_41, 'P_38, 'P_42, 'P_35}'                       |
| 1798 | 0.624               | 0.674               | \$ 21.42                     | '{P_37, 'T4, 'P_41, 'P_38, 'P_42, 'P_35, 'T2}'                       |
| 1425 | 0.625               | 0.671               | \$ 21.32                     | '{P_37, 'T4, 'P_41, 'P_38, 'P_42, 'P_35}'                            |
| 991  | 0.609               | 0.651               | \$ 21.23                     | '{P_37, 'P_41, 'P_38, 'P_42, 'P_35}'                                 |
| 1985 | 0.586               | 0.643               | \$ 19.65                     | '{T1, 'T3, 'P_37, 'T4, 'T5, 'P_41, 'P_38, 'P_42, 'T2}'               |
| 1904 | 0.587               | 0.640               | \$ 19.45                     | '{T1, 'P_37, 'T4, 'T5, 'P_41, 'P_38, 'P_42, 'T2}'                    |
| 1636 | 0.588               | 0.636               | \$ 19.36                     | '{T1, 'P_37, 'T4, 'P_41, 'P_38, 'P_42, 'T2}'                         |
| 1166 | 0.580               | 0.625               | \$ 19.26                     | '{T1, 'P_37, 'T4, 'P_41, 'P_38, 'P_42}'                              |
| 1403 | 0.580               | 0.625               | \$ 19.26                     | '{P_37, 'T4, 'T5, 'P_41, 'P_38, 'P_42}'                              |
| 1426 | 0.580               | 0.625               | \$ 19.26                     | '{P_37, 'T4, 'P_41, 'P_38, 'P_42, 'T2}'                              |
| 914  | 0.581               | 0.622               | \$ 19.17                     | '{P_37, 'T4, 'P_41, 'P_38, 'P_42}'                                   |
| 508  | 0.565               | 0.602               | \$ 19.07                     | '{P_41, 'P_38, 'P_42, 'P_37}'                                        |
| 1990 | 0.541               | 0.593               | \$ 16.48                     | '{T1, 'T3, 'P_37, 'T4, 'T5, 'P_41, 'P_42, 'P_35, 'T2}'               |
| 1909 | 0.542               | 0.590               | \$ 16.29                     | '{T1, 'P_37, 'T4, 'T5, 'P_41, 'P_42, 'P_35, 'T2}'                    |
| 1641 | 0.543               | 0.586               | \$ 16.20                     | '{T1, 'P_37, 'T4, 'P_41, 'P_42, 'P_35, 'T2}'                         |
| 1172 | 0.535               | 0.575               | \$ 16.10                     | '{T1, 'P_37, 'T4, 'P_41, 'P_42, 'P_35}'                              |
| 1409 | 0.535               | 0.575               | \$ 16.10                     | '{P_37, 'T4, 'T5, 'P_41, 'P_42, 'P_35}'                              |
| 1431 | 0.535               | 0.575               | \$ 16.10                     | '{P_37, 'T4, 'P_41, 'P_42, 'P_35, 'T2}'                              |
| 920  | 0.536               | 0.572               | \$ 16.01                     | '{P_37, 'T4, 'P_41, 'P_42, 'P_35}'                                   |

|      |       |       |          |                                                                |
|------|-------|-------|----------|----------------------------------------------------------------|
| 1994 | 0.518 | 0.568 | \$ 14.46 | '{T1', 'T3', 'P_37', 'T4', 'T5', 'P_38', 'P_42', 'P_35', 'T2}' |
| 1913 | 0.519 | 0.565 | \$ 14.27 | '{T1', 'P_37', 'T4', 'T5', 'P_38', 'P_42', 'P_35', 'T2}'       |
| 1645 | 0.519 | 0.562 | \$ 14.18 | '{T1', 'P_37', 'T4', 'P_38', 'P_42', 'P_35', 'T2}'             |
| 1178 | 0.512 | 0.551 | \$ 14.08 | '{T1', 'P_37', 'T4', 'P_38', 'P_42', 'P_35}'                   |
| 1415 | 0.512 | 0.551 | \$ 14.08 | '{P_37', 'T4', 'T5', 'P_38', 'P_42', 'P_35}'                   |
| 1435 | 0.512 | 0.551 | \$ 14.08 | '{P_37', 'T4', 'P_38', 'P_42', 'P_35', 'T2}'                   |
| 926  | 0.513 | 0.548 | \$ 13.99 | '{P_37', 'T4', 'P_38', 'P_42', 'P_35}'                         |
| 654  | 0.497 | 0.532 | \$ 13.95 | '{T1', 'P_37', 'T4', 'P_41', 'P_42}'                           |
| 900  | 0.497 | 0.532 | \$ 13.95 | '{P_37', 'T4', 'T5', 'P_41', 'P_42}'                           |
| 921  | 0.497 | 0.532 | \$ 13.95 | '{P_37', 'T4', 'P_41', 'P_42', 'T2}'                           |
| 520  | 0.498 | 0.530 | \$ 13.89 | '{P_38', 'P_42', 'P_37', 'P_35}'                               |
| 444  | 0.497 | 0.529 | \$ 13.85 | '{P_41', 'P_37', 'P_42', 'T4}'                                 |
| 1830 | 0.481 | 0.526 | \$ 12.31 | '{T1', 'T3', 'P_37', 'T4', 'T5', 'P_38', 'P_42', 'T2}'         |
| 1626 | 0.481 | 0.523 | \$ 12.12 | '{T1', 'P_37', 'T4', 'T5', 'P_38', 'P_42', 'T2}'               |
| 1179 | 0.482 | 0.519 | \$ 12.02 | '{T1', 'P_37', 'T4', 'P_38', 'P_42', 'T2}'                     |
| 658  | 0.475 | 0.509 | \$ 11.93 | '{T1', 'P_37', 'T4', 'P_38', 'P_42}'                           |
| 904  | 0.475 | 0.509 | \$ 11.93 | '{P_37', 'T4', 'T5', 'P_38', 'P_42}'                           |
| 927  | 0.475 | 0.509 | \$ 11.93 | '{P_37', 'T4', 'P_38', 'P_42', 'T2}'                           |
| 448  | 0.475 | 0.506 | \$ 11.83 | '{P_42', 'P_37', 'P_38', 'T4}'                                 |
| 188  | 0.462 | 0.490 | \$ 11.74 | '{P_38', 'P_42', 'P_37}'                                       |
| 1835 | 0.444 | 0.484 | \$ 9.15  | '{T1', 'T3', 'P_37', 'T4', 'T5', 'P_42', 'P_35', 'T2}'         |
| 1631 | 0.444 | 0.481 | \$ 8.96  | '{T1', 'P_37', 'T4', 'T5', 'P_42', 'P_35', 'T2}'               |
| 1184 | 0.444 | 0.478 | \$ 8.86  | '{T1', 'P_37', 'T4', 'P_42', 'P_35', 'T2}'                     |
| 664  | 0.438 | 0.468 | \$ 8.76  | '{T1', 'P_37', 'T4', 'P_42', 'P_35}'                           |
| 910  | 0.438 | 0.468 | \$ 8.76  | '{P_37', 'T4', 'T5', 'P_42', 'P_35}'                           |
| 932  | 0.438 | 0.468 | \$ 8.76  | '{P_37', 'T4', 'P_42', 'P_35', 'T2}'                           |
| 454  | 0.438 | 0.465 | \$ 8.67  | '{P_37', 'P_42', 'T4', 'P_35}'                                 |
| 194  | 0.426 | 0.450 | \$ 8.57  | '{P_42', 'P_37', 'P_35}'                                       |
| 1499 | 0.411 | 0.447 | \$ 6.99  | '{T1', 'T3', 'P_37', 'T4', 'T5', 'P_42', 'T2}'                 |
| 1163 | 0.412 | 0.444 | \$ 6.80  | '{T1', 'P_37', 'T4', 'T5', 'P_42', 'T2}'                       |
| 665  | 0.412 | 0.441 | \$ 6.71  | '{T1', 'P_37', 'T4', 'P_42', 'T2}'                             |
| 272  | 0.406 | 0.432 | \$ 6.61  | '{T1', 'P_37', 'P_42', 'T4}'                                   |
| 439  | 0.406 | 0.432 | \$ 6.61  | '{P_37', 'P_42', 'T4', 'T5}'                                   |
| 455  | 0.406 | 0.432 | \$ 6.61  | '{P_37', 'P_42', 'T4', 'T2}'                                   |
| 152  | 0.406 | 0.429 | \$ 6.52  | '{P_37', 'P_42', 'T4}'                                         |
| 43   | 0.394 | 0.415 | \$ 6.42  | '{P_42', 'P_37}'                                               |
| 1540 | 0.370 | 0.402 | \$ 4.74  | '{T1', 'T3', 'T4', 'T5', 'P_42', 'P_35', 'T2}'                 |
| 1204 | 0.370 | 0.399 | \$ 4.55  | '{T1', 'T4', 'T5', 'P_42', 'P_35', 'T2}'                       |
| 701  | 0.370 | 0.396 | \$ 4.45  | '{T1', 'T4', 'P_42', 'P_35', 'T2}'                             |
| 293  | 0.365 | 0.388 | \$ 4.35  | '{T1', 'P_42', 'T4', 'P_35}'                                   |
| 469  | 0.365 | 0.388 | \$ 4.35  | '{P_42', 'T4', 'P_35', 'T5}'                                   |
| 491  | 0.365 | 0.388 | \$ 4.35  | '{P_42', 'T4', 'P_35', 'T2}'                                   |
| 173  | 0.365 | 0.386 | \$ 4.26  | '{P_42', 'T4', 'P_35}'                                         |
| 64   | 0.355 | 0.373 | \$ 4.16  | '{P_42', 'P_35}'                                               |
| 1058 | 0.343 | 0.371 | \$ 2.58  | '{T1', 'T3', 'T4', 'T5', 'P_42', 'T2}'                         |
| 680  | 0.343 | 0.368 | \$ 2.39  | '{T1', 'T4', 'T5', 'P_42', 'T2}'                               |
| 294  | 0.343 | 0.366 | \$ 2.30  | '{T1', 'P_42', 'T4', 'T2}'                                     |
| 81   | 0.338 | 0.358 | \$ 2.20  | '{T1', 'P_42', 'T4}'                                           |
| 158  | 0.338 | 0.358 | \$ 2.20  | '{P_42', 'T4', 'T5}'                                           |
| 174  | 0.338 | 0.358 | \$ 2.20  | '{P_42', 'T4', 'T2}'                                           |
| 36   | 0.338 | 0.356 | \$ 2.10  | '{P_42', 'T4}'                                                 |
| 9    | 0.328 | 0.344 | \$ 2.01  | '{P_42}'                                                       |
| 574  | 0.303 | 0.327 | \$ 0.57  | '{T1', 'T3', 'T4', 'T5', 'T2}'                                 |
| 280  | 0.303 | 0.324 | \$ 0.38  | '{T1', 'T2', 'T4', 'T5}'                                       |
| 83   | 0.303 | 0.322 | \$ 0.29  | '{T1', 'T4', 'T2}'                                             |
| 13   | 0.299 | 0.315 | \$ 0.19  | '{T1', 'T4}'                                                   |

|    |       |       |         |              |
|----|-------|-------|---------|--------------|
| 32 | 0.299 | 0.315 | \$ 0.19 | '{T4', 'T5}' |
| 38 | 0.299 | 0.315 | \$ 0.19 | '{T4', 'T2}' |
| 3  | 0.299 | 0.313 | \$ 0.10 | '{T4}'       |
| 0  | 0.290 | 0.303 | \$ -    | 'set()'      |

## References

- [1] S. Jenkins, "The Chemical Engineering Plant Cost Index," Access Intelligence, 2025. [Online]. Available: <https://www.chemengonline.com/pci-home>
- [2] AmeriTex Pipe & Products LLC, "How Much Does Concrete Pipe Cost?" AmeriTex Pipe & Products LLC, Dallas, TX, May 11, 2022. [Online]. Available: <https://www.ameritexpipe.com/how-much-does-concrete-pipe-cost/>
- [3] CST Industries, Inc, "Wastewater Covers & Storage Tanks," USA, 2025. [Online]. Available: <https://www.cstindustries.com/waste-water-storage-tanks-manufacturer/>
- [4] Matches, *Matches' Process Equipment Cost Estimates*. (2014). [Online]. Available: <https://www.matche.com/equipcost/Default.html>
